# Supplementary material for: A metastable liquid melted from a crystalline solid under decompression
Source: PubMed Central journal article supplement (PMC5264249; doi:10.1038/ncomms14260), 2017-01-23
Supplement: ncomms14260-s1.pdf [file ncomms14260-s1.pdf]

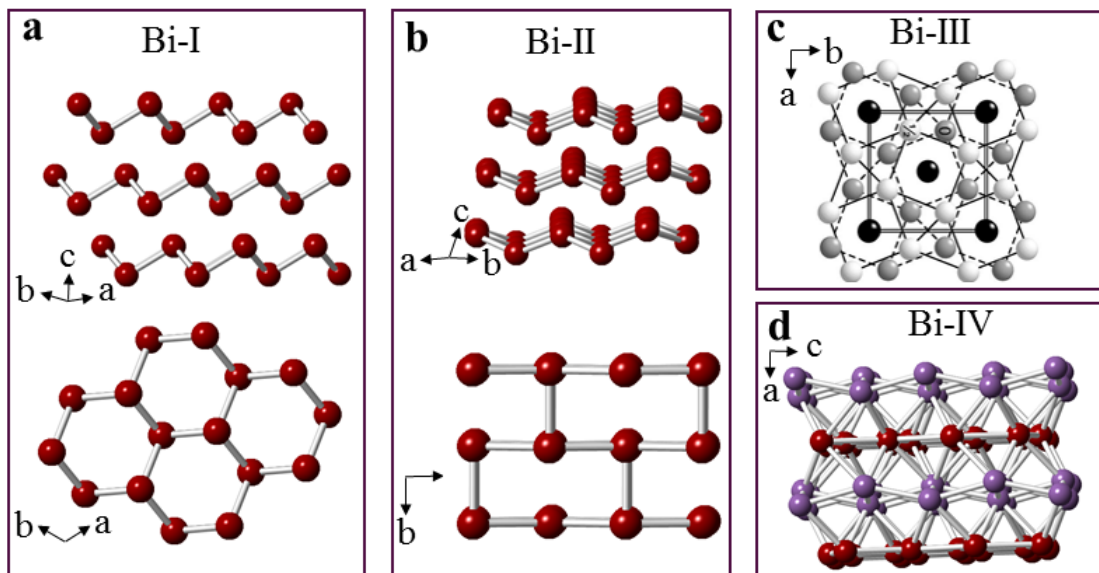

**Supplementary Figure 1 | Crystal structures of different Bi phases. (a) Structure of Bi-I<sup>1</sup>. (b) Structure of Bi-II<sup>2</sup>. (c) Structure of Bi-III<sup>3</sup>. (d) Structure of Bi-IV<sup>4</sup>.**

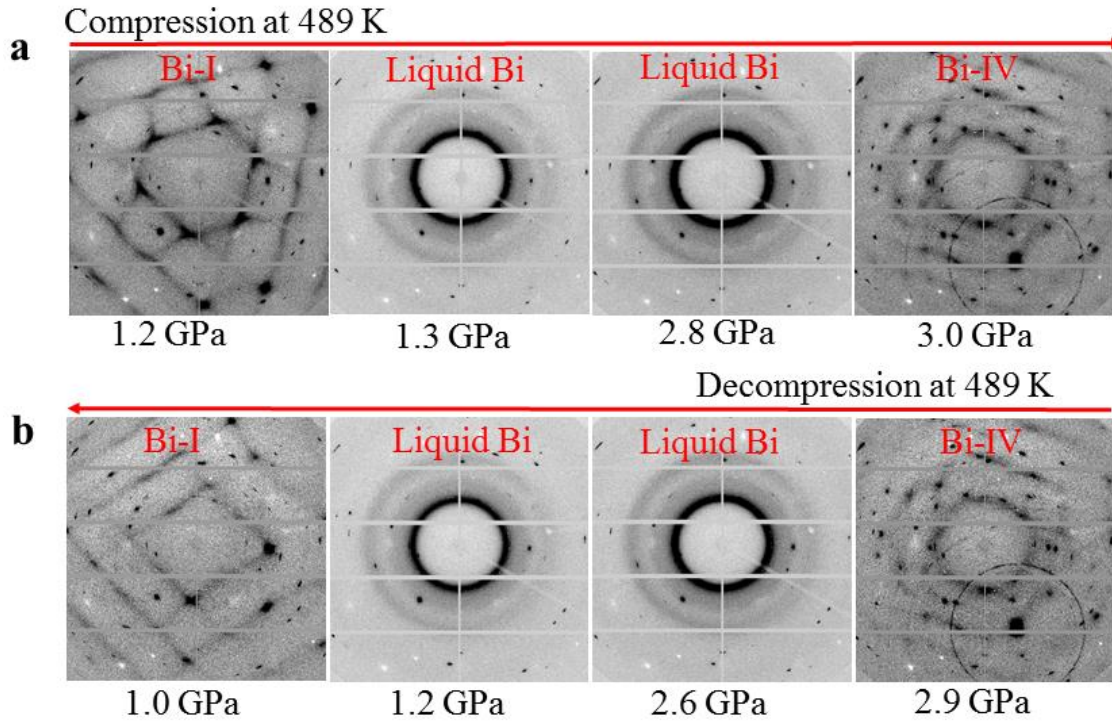

**Supplementary Figure 2 | Diffraction images at 489 K with NaCl as pressure medium. (a)** Sample Bi was compressed from 0.5 GPa to 3.2 GPa (Right red arrow). Bi-I phase transforms to liquid Bi at  $\sim 1.3$  GPa, followed by crystallization into Bi-IV at  $\sim 2.8$  GPa. **(b)** Sample Bi is decompressed from 3.2 GPa to 0.5 GPa (left red arrow). Bi-IV melts into liquid Bi at  $\sim 2.6$  GPa, followed by crystallization into Bi-I at  $\sim 1.2$  GPa. The background is subtracted for all images. The diffraction spots in liquid Bi come from the pressure medium of NaCl or the diamond anvils.

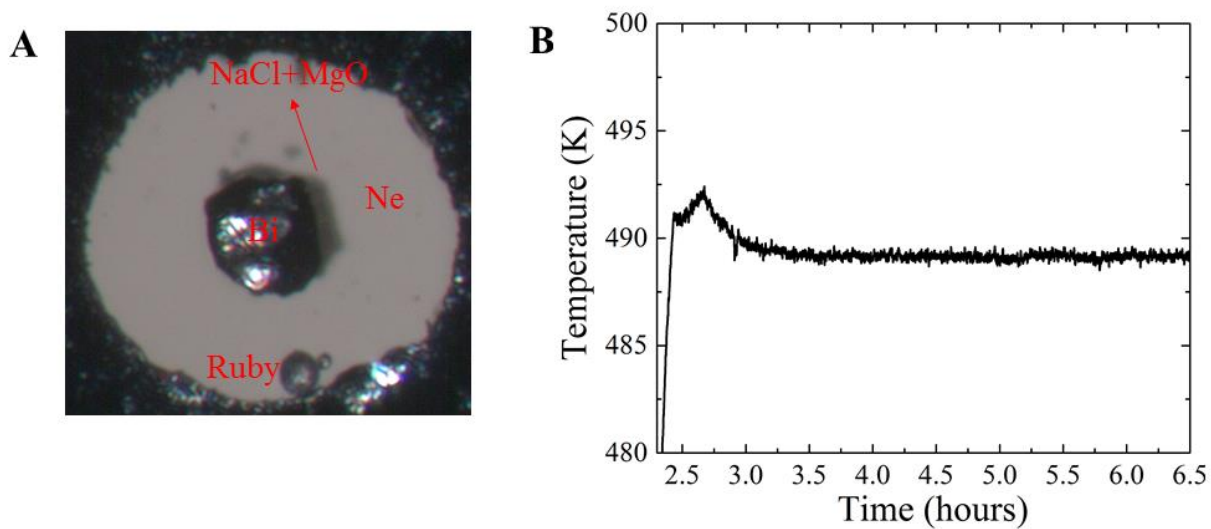

**Supplementary Figure 3 | Photo of a sample chamber after gas loading and typical temperature variations in experiments.** (a) A photo of a sample chamber at 0.5 GPa after neon was loaded. The sample chamber is  $\sim 150 \mu\text{m}$  in diameter, and the bismuth sample dimension is  $30 \times 30 \mu\text{m}$ . (b) Typical temperature variations recorded as a function of time during one experiment. The Bi sample is compressed and decompressed after temperature becomes stable within a degree.

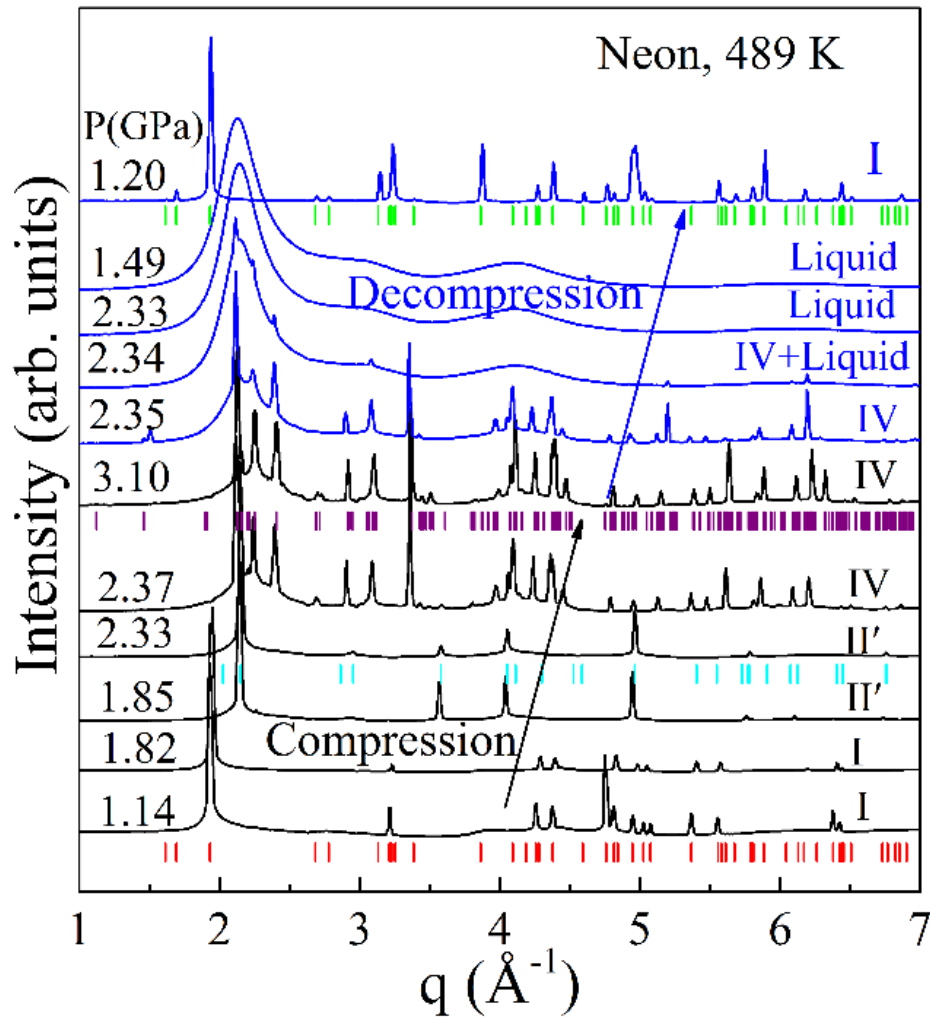

**Supplementary Figure 4 | Integrated x-ray diffraction patterns of Bi at 489 K.** The Bi sample is compressed and decompressed at hydrostatic condition with neon as pressure medium. Upon compression (black arrow). Bi-I phase transforms to Bi-II' at ~1.8 GPa, followed by II'-to-IV transition at ~2.4 GPa. Blue arrow indicates that Bi is decompressed from 3.1 GPa to 1.0 GPa. Bi-IV melts into liquid Bi at ~2.3 GPa, followed by crystallization of liquid Bi at ~1.2 GPa. The symbol bars below each of the corresponding diffraction patterns indicate the indexing of the crystal phases.

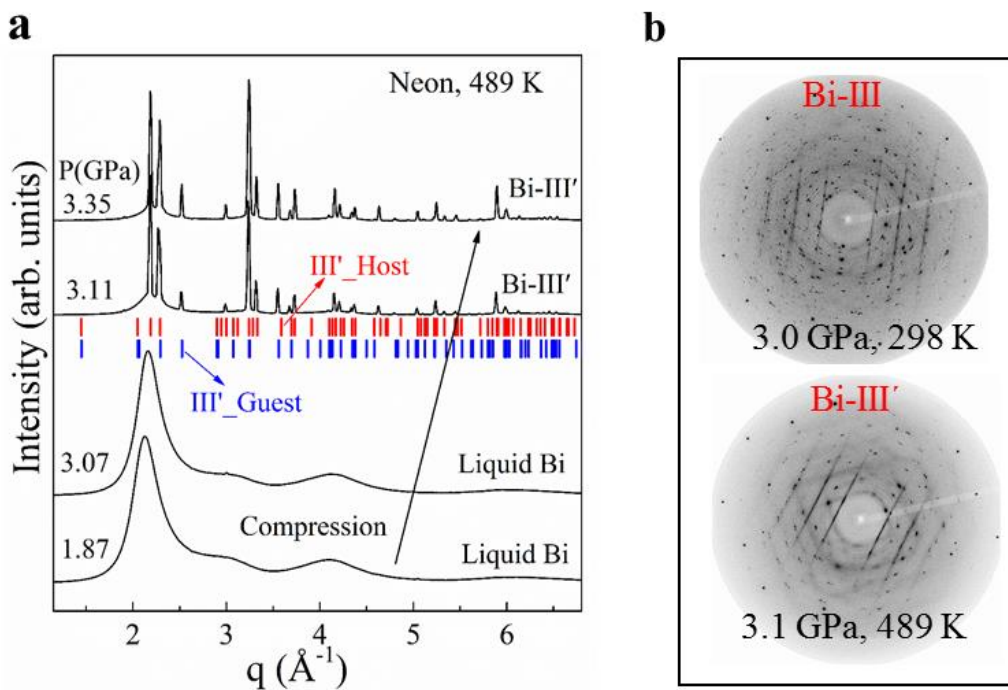

**Supplementary Figure 5 | Phase transition of DIL under hydrostatic condition at 489 K.** Neon is used as pressure medium. **(a)** The DIL is compressed from  $\sim 1.9$  GPa to 3.3 GPa. It crystallizes into Bi-III-like phase (Bi-III') at  $\sim 3.1$  GPa, which can be indexed using a mixture of two body-centered-tetragonal phases (red and blue bars). The lattice parameters are close to those of the host and guest structures of Bi-III at  $\sim 3$  GPa<sup>1</sup>. **(b)** Comparison of diffraction images of Bi-III' and Bi-III. There are similar straight diffuse scattering lines in both Bi-III and Bi-III', which comes from the disordered guest chains<sup>5-9</sup>.

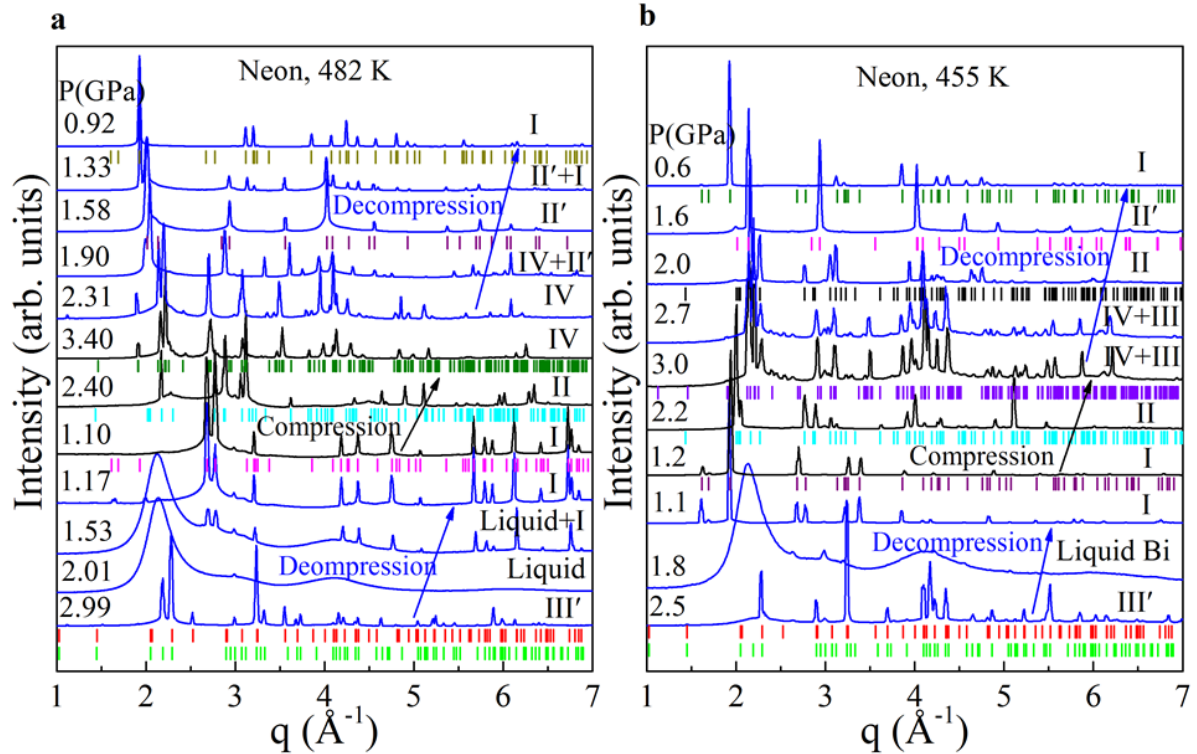

**Supplementary Figure 6 | Integrated x-ray diffraction patterns of Bi under hydrostatic condition.** Neon is used as pressure transmitting medium. **(a)** Sample is decompressed from  $\sim 3.0$  GPa to 1.1 GPa (blue arrow) at 482 K.  $\text{III}' \rightarrow \text{liquid} \rightarrow \text{I}$  transitions are observed. Then sample is compressed from 1.1 GPa to 3.4 GPa with  $\text{I} \rightarrow \text{II} \rightarrow \text{IV}$  transitions (black arrow). When the starting phase is IV,  $\text{IV} \rightarrow \text{II}' \rightarrow \text{I}$  transitions appear (blue arrows on the top). **(b)** Sample is decompressed and compressed at 455 K. When decompressing Bi- $\text{III}'$ ,  $\text{III}' \rightarrow \text{liquid} \rightarrow \text{I}$  transitions are observed while decompressing mixture of  $\text{IV} + \text{III}$  led to  $\text{IV} + \text{III} \rightarrow \text{II} \rightarrow \text{I}$  transitions. Under compression,  $\text{I} \rightarrow \text{II} \rightarrow \text{IV}$  transitions appear. The symbol bars below the corresponding diffraction patterns indicate the indexing of the crystal phases.

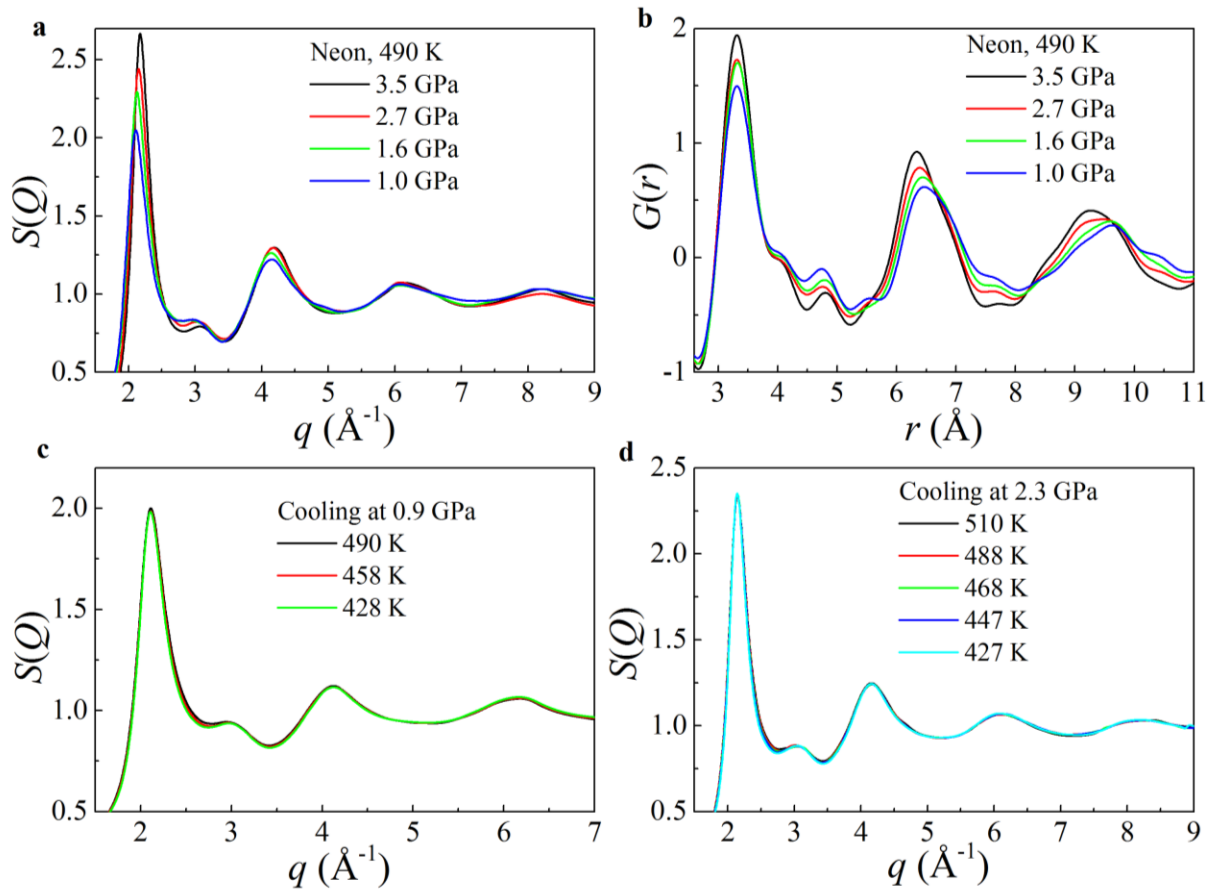

**Supplementary Figure 7 | Effect of temperature and pressure on the structure of DIL and supercooled liquid.** (a) Evolution of structure factors,  $S(Q)$ , of the DIL under various pressures at 490 K. (b) Reduced pair distribution functions,  $G(r)$  of the DIL under pressures. (c)  $S(Q)$  of the supercooled liquid Bi at 0.9 GPa. (d)  $S(Q)$  of the supercooled liquid Bi at 2.3 GPa.

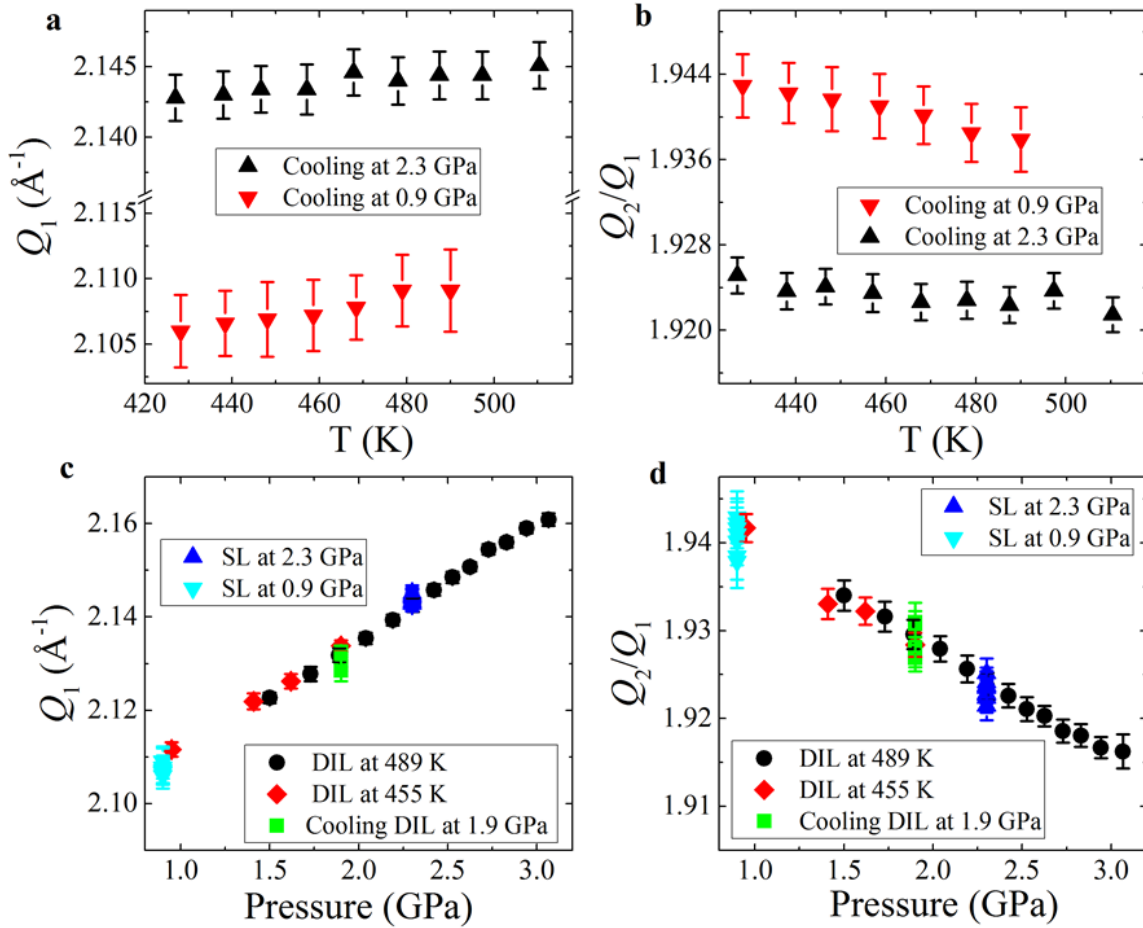

**Supplementary Figure 8 | Pressure and temperature dependences of  $Q_1$  and  $Q_2/Q_1$  of the DIL and the supercooled liquid.** (a) and (b) Temperature-dependence of  $Q_1$  and  $Q_2/Q_1$  under cooling at 0.9 GPa and 2.3 GPa, respectively.  $Q_1$  decreases slightly during cooling while  $Q_2/Q_1$  increases slightly with cooling. (c) and (d) Pressure-dependences of  $Q_1$  and  $Q_2/Q_1$  of the DIL. When the data of supercooled liquid Bi in (a) and (b) were over-plotted on (c) and (d), we find that  $Q_1$  and  $Q_2$  of the supercooled liquid at different temperatures are close to those of the DIL at corresponding pressures, indicating the structural similarity of the DIL with the supercooled liquid.



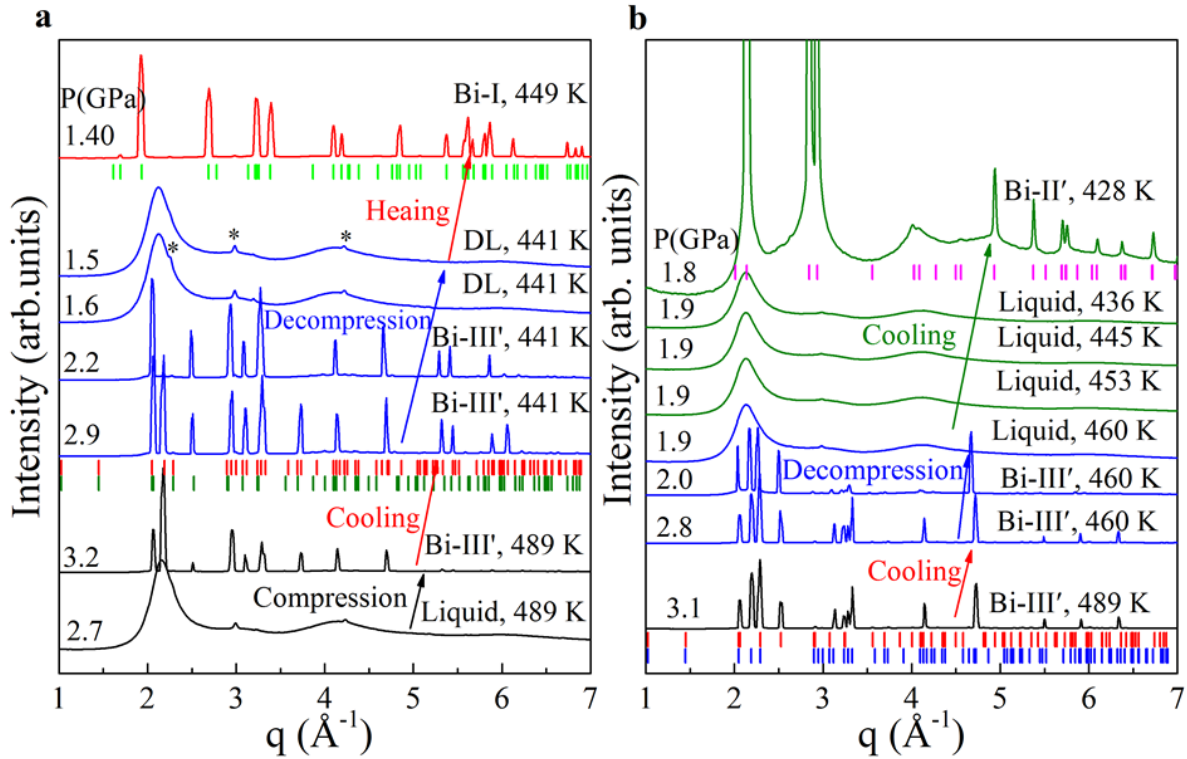

**Supplementary Figure 9 | Crystallization of the DIL under heating and cooling.** Bi-III' is obtained by compressing liquid Bi above 489 K. (a) The DIL is compressed at 489 K and transformed to Bi-III'. Then Bi-III' is cooled from 489 K to 441 K. Keeping the temperature at 441 K, Bi-III' is decompressed and melts into a liquid state under decompression. After DIL is obtained at 441 K, the metastable liquid Bi is heated from 441 K to 449 K and crystallizes into Bi-I during heating. After crystallization, the pressure changes from 1.5 GPa to 1.4 GPa. (b) Decompression-induced liquid crystallizes into Bi-II' under cooling from 460 K to 428 K. The pressure changes from 1.9 GPa to 1.8 GPa after crystallization.

**Supplementary Table 1 | Unit cell parameters of Bi-IV, III', II, II' and I. The structural models of these crystalline phases are from Refs. 1, 2, 4, 10.**

|           | IV (2.97 GPa)                   | III' (3.46 GPa)                      |                                       | II (2.0 GPa)                  | II' (2.0 GPa)           | I (1.14 GPa)             |
|-----------|---------------------------------|--------------------------------------|---------------------------------------|-------------------------------|-------------------------|--------------------------|
| Structure | Orthorhombic<br>( <i>Cmca</i> ) | Tetragonal<br>(host: <i>I4/mcm</i> ) | Tetragonal<br>(Guest: <i>I4/mmm</i> ) | Monoclinic<br>( <i>C2/m</i> ) | Tetragonal              | Hexagonal                |
| <i>a</i>  | 11.178(1) Å                     | 8.673(3) Å                           | 8.670(3) Å                            | 6.663(4) Å                    | 6.222(3) Å              | 4.522(1) Å               |
| <i>b</i>  | 6.618(1) Å                      |                                      |                                       | 6.181(3) Å                    |                         |                          |
| <i>c</i>  | 6.596(1) Å                      | 4.266(5) Å                           | 3.247(3) Å                            | 3.312(1) Å                    | 3.320(1) Å              | 11.681(3) Å              |
| $\beta$   |                                 |                                      |                                       | 110.93(2)°                    |                         |                          |
| <i>V</i>  | 487.92 (9) Å <sup>3</sup>       | 320.9(3) Å <sup>3</sup>              | 244.1(2) Å <sup>3</sup>               | 127.39(5) Å <sup>3</sup>      | 128.5(1) Å <sup>3</sup> | 206.90(5) Å <sup>3</sup> |

**Supplementary Table 2 Summary of the phase transitions under hydrostatic condition and different temperatures.** Red text indicates the occurrence of decompression-induced liquid, i.e., crystal-liquid-crystal transitions, while crystal-crystal-crystal transitions are observed under compression. The last column indicates the numbers of repeated experiments at corresponding temperatures. In each experimental run, a fresh sample is used.

| <b>T (K)</b> | <b>Compression</b> | <b>Decompression</b>  | <b>Times</b> |
|--------------|--------------------|-----------------------|--------------|
| 505          | I → Liquid → Bi-N  | IV → Liquid → I       | 1            |
| 489          | I → II' → IV       | IV → Liquid → I       | 5            |
|              | Liquid → III'      | III' → Liquid → I     | 5            |
| 482          |                    | III' → Liquid → I     | 1            |
|              | I → II → IV        | IV → II' → I          | 1            |
| 455          |                    | III' → Liquid → I     | 2            |
|              | I → II → IV+III    | IV+III → II → II' → I | 2            |
| 441          | I → II → III       | III' → Liquid → I     | 1            |
| 423          | I → II → III       | III' → II → I         | 2            |

## SUPPLEMENTARY REFERENCES:

1. Katzke, H. & Toledano, P. Displacive mechanisms and order-parameter symmetries for the A7-incommensurate-bcc sequences of high-pressure reconstructive phase transitions in Group Va elements. *Phys. Rev. B* **77**, 024109 (2008).
2. Akselrud, L. G., Hanfland, M. & Schwarz, U. Refinement of the crystal structure of Bi-II, at 2.54 GPa. *Z Krist-New Cryst. St.* **218**, 415-416 (2003).
3. McMahon, M. I., Degtyareva, O. & Nelmes, R. J. Ba-IV-type incommensurate crystal structure in group-V metals. *Phys. Rev. Lett.* **85**, 4896-4899 (2000).
4. Chaimayo, W. *et al.* High-pressure, high-temperature single-crystal study of Bi-IV. *High Pressure Res.* **32**, 442-449 (2012).
5. Nelmes, R. J., Allan, D. R., McMahon, M. I. & Belmonte, S. A. Self-hosting incommensurate structure of barium IV. *Phys. Rev. Lett.* **83**, 4081-4084 (1999).
6. McMahon, M. I. & Nelmes, R. J. Chain "melting" in the composite Rb-IV structure. *Phys. Rev. Lett.* **93**, 055501 (2004).
7. Falconi, S. *et al.* X-ray diffraction study of diffuse scattering in incommensurate rubidium-IV. *Phys. Rev. B* **73**, 214102 (2006).
8. McBride, E. E. *et al.* One-dimensional chain melting in incommensurate potassium. *Phys. Rev. B* **91**, 144111 (2015).
9. McMahon, M. I., Bovornratanaraks, T., Allan, D. R., Belmonte, S. A. & Nelmes, R. J. Observation of the incommensurate barium-IV structure in strontium phase V. *Phys. Rev. B* **61**, 3135-3138 (2000).
10. Principi, E. *et al.* Metastable phase diagram of Bi probed by single-energy x-ray absorption detection and angular dispersive x-ray diffraction. *Phys. Rev. B* **74**, 064101 (2006).
